# Supplementary material for: CDDO-Me Inhibits Microglial Activation and Monocyte Infiltration by Abrogating NFκB- and p38 MAPK-Mediated Signaling Pathways Following Status Epilepticus
Source: PubMed Central journal article supplement (PMC7290793; doi:10.3390/cells9051123), 2020-05-01
Supplement: cells-09-01123-s001.pdf [file cells-09-01123-s001.pdf]

Supplementary information

**CDDO-Me inhibits microglial activation and monocyte infiltration by  
abrogating NF $\kappa$ B-p38 MAPK-MCP-1 signaling pathway following status  
epilepticus**

**Ji-Eun Kim, Hana Park, Ji-Eun Lee and Tae-Cheon Kang\***

Department of Anatomy and Neurobiology, Institute of Epilepsy Research, College of Medicine,  
Hallym University, Chuncheon, Kangwon-Do 24252, South Korea<sup>1</sup>

**\*Correspondence:** Dr. Tae-Cheon Kang, Department of Anatomy and Neurobiology, College of Medicine,  
Hallym University, Okcheon-dong, Chuncheon, Kangwon-Do, 24252, South Korea, tckang@hallym.ac.kr

Supplementary Table 1. Average of weight and consumptions of food and water in each group

|               | Group    | Weight (g) | Food consumption (g/day) | Water consumption (ml/day) |
|---------------|----------|------------|--------------------------|----------------------------|
| Control       | Vehicle  | 224 ± 14.8 | 24 ± 9.4                 | 28 ± 7.1                   |
|               | CDDO-Me  | 218 ± 21.3 | 27 ± 10.1                | 26 ± 6.8                   |
|               | SN50     | 231 ± 18.1 | 22 ± 7.1                 | 31 ± 5.3                   |
| 1 day-post SE | Vehicle* | 211 ± 24.8 | 12 ± 8.8                 | 11 ± 8.5                   |
|               | CDDO-Me* | 198 ± 22.4 | 14 ± 9.4                 | 12 ± 5.7                   |
|               | SN50*    | 220 ± 27.9 | 16 ± 8.3                 | 9 ± 4.8                    |
| 2 day-post SE | Vehicle  | 220 ± 18.3 | 28 ± 5.3                 | 25 ± 6.4                   |
|               | CDDO-Me  | 219 ± 7.2  | 26 ± 4.9                 | 27 ± 5.8                   |
|               | SN50     | 212 ± 19.9 | 31 ± 6.2                 | 28 ± 6.7                   |
| 3 day-post SE | Vehicle  | 226 ± 11.7 | 29 ± 7.1                 | 29 ± 3.3                   |
|               | CDDO-Me  | 223 ± 19.4 | 27 ± 8.7                 | 26 ± 7.3                   |
|               | SN50     | 229 ± 21.8 | 28 ± 6.3                 | 23 ± 6.2                   |

Mean ± SD; No statistical significance in each group.

\* Animals were given Hartmann's solution (130 mM NaCl, 4 mM KCl, 3 mM CaCl, and 28 mM lactate; 2 ml/100 g, i.p.)

**Fig. 2A**

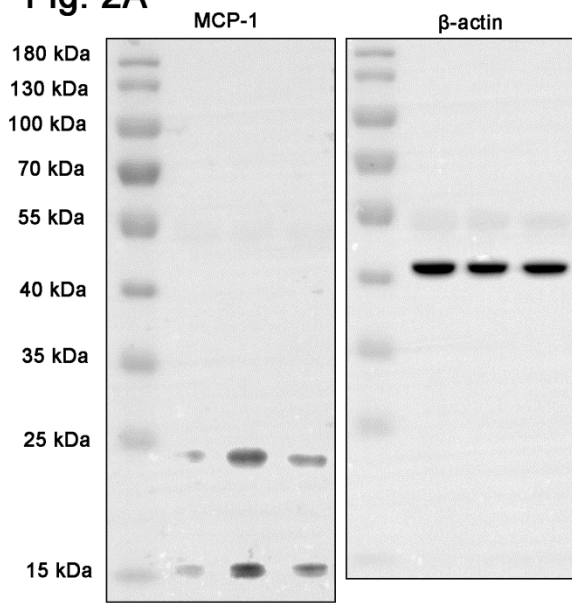

**Fig. 3A**

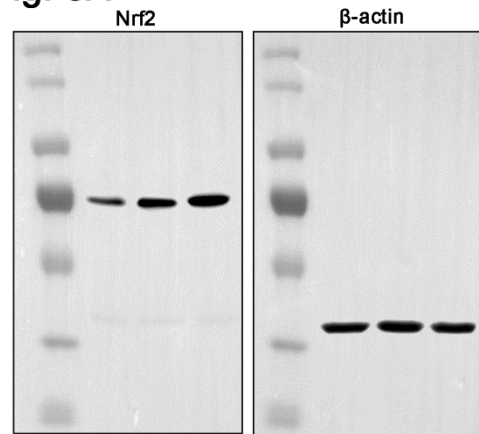

**Fig. 4A**

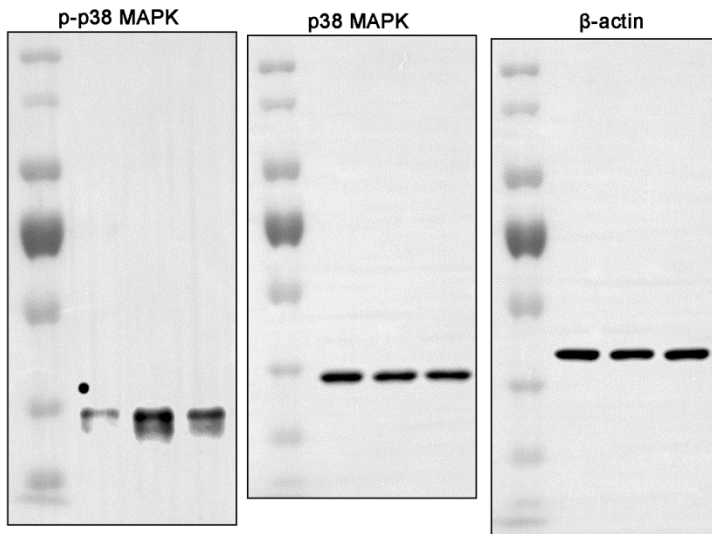

Supplementary Figure 1. The whole gel images of Western blot in Figures 2A, 3A and 4A.

**Fig. 5A**

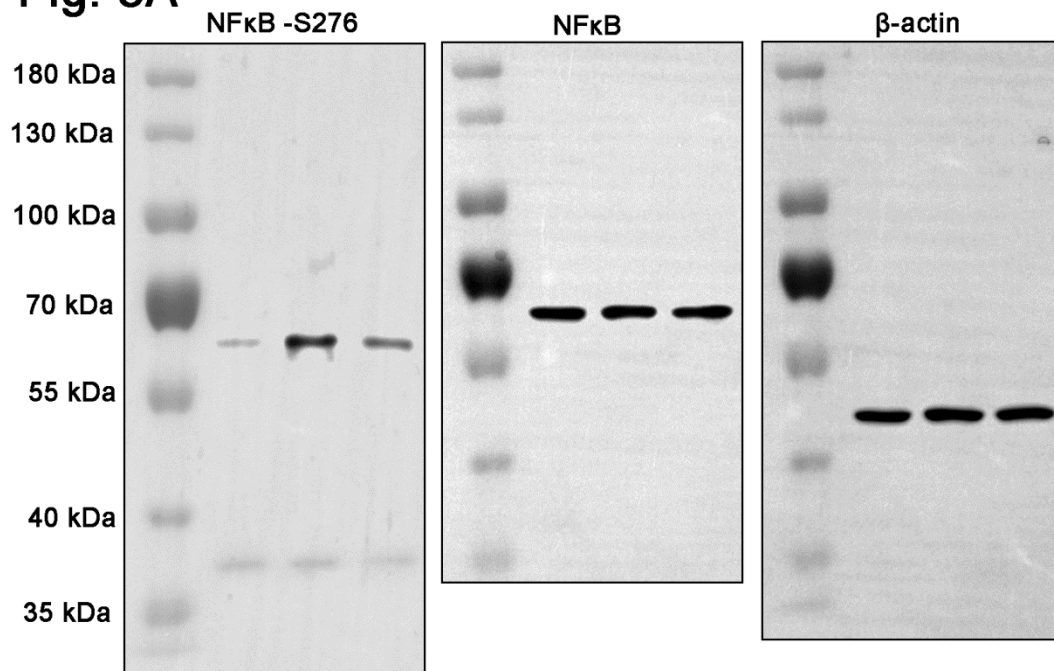

**Fig. 6A**

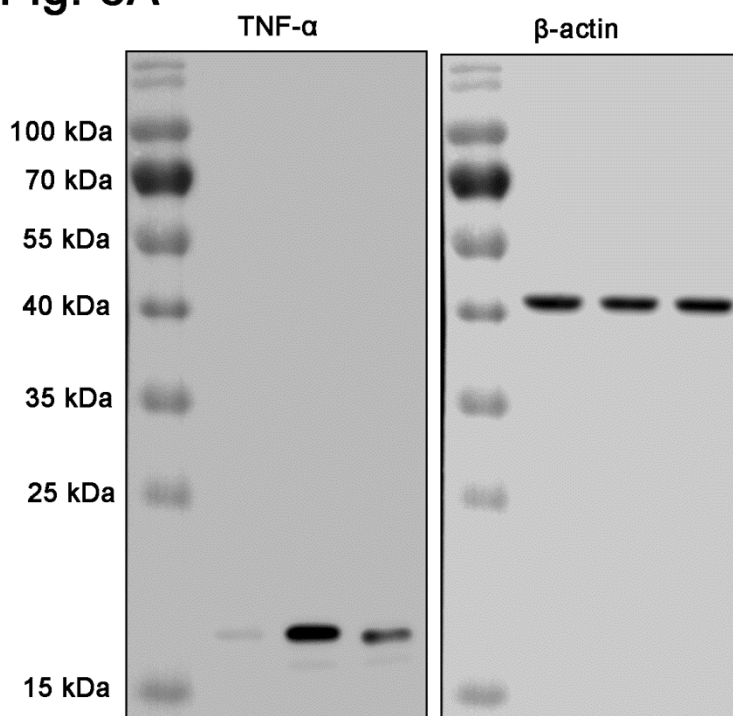

Supplementary Figure 2. The whole gel images of Western blot in Figures 5A and 6A.

**Fig. 7A**

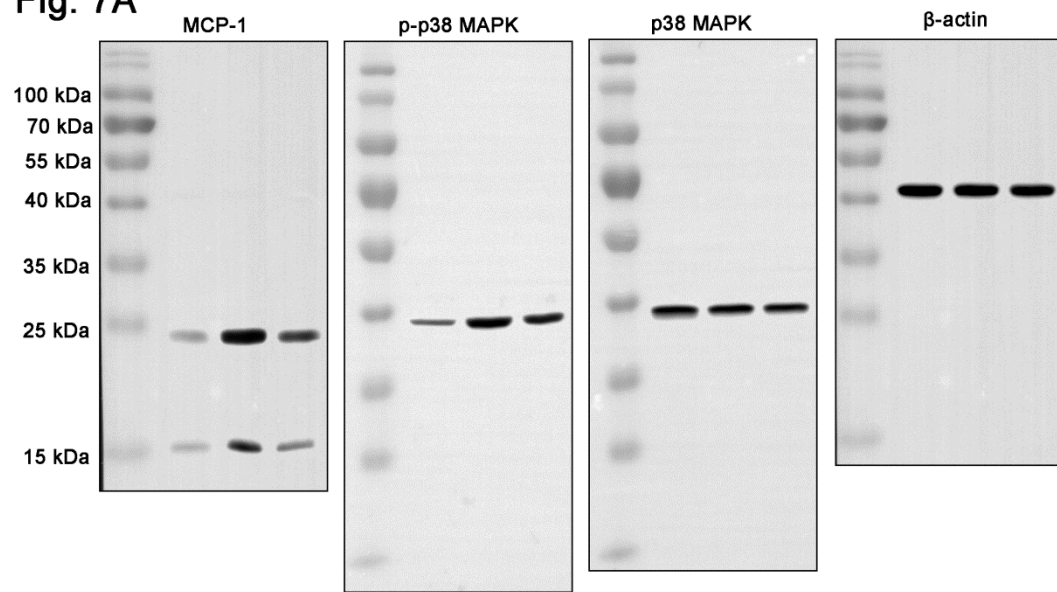

Supplementary Figure 3. The whole gel images of Western blot in Figure 7A.
